# Supplementary material
Source: Research Square preprint supplement (doi:10.21203/rs.3.rs-8739414/v1)
Supplement: Supplementary file 1 [file ba78b45cde2d145a5df6c51a.docx]

**Highlights**

- First integrated soil characteristic study under Syzygium travancoricum habitats.
- Soils classified as Ultisols: Ustic Palehumults under Syzygium travancoricum and Typic Haplustults under mixed vegetation
- Greater pedogenic development under S. travancoricum canopy.
- Quartz and kaolinite dominate, with intense tropical weathering.
- Acidic soils with low nutrients could limit S. travancoricum regeneration.
